# Supplementary material for: Theoretical Description of R–X⋯NH3 Halogen Bond Complexes: Effect of the R Group on the Complex Stability and Sigma-Hole Electron Depletion
Source: MDPI journal article supplement (doi:10.3390/molecules25030530), 2020-01-25

## Supporting Information

### The Information Content of the Conditional Pair Density as a Theoretical Tool for the Analysis of the Sigma Hole in Halogen Bonded Systems

Juan Zurita <sup>1,2</sup>, Vladimir Rodriguez <sup>1,2,3</sup>, Cesar Zambrano <sup>1,2</sup>, Jose Ramón Mora <sup>1,2</sup>, Luis Rincón <sup>1,2</sup> and F. Javier Torres <sup>1,2,\*</sup>

**Figure S1:**  $\chi_{XC}^{\sigma}$  mapped onto the 0.04 a.u. isovalue of the electronic density for the the R—Br  $\cdots$  NH<sub>3</sub> complexes (R = CF<sub>3</sub>, CHF<sub>2</sub>, CH<sub>2</sub>F, CH<sub>3</sub>, CH<sub>3</sub>CH<sub>2</sub>, CH<sub>2</sub>CH, and CHC). The range 0.2 – 0.5 goes from red to blue. For a sake of clarity, the NH<sub>3</sub> molecule and map are hidden in the view of the lower part of the figures.

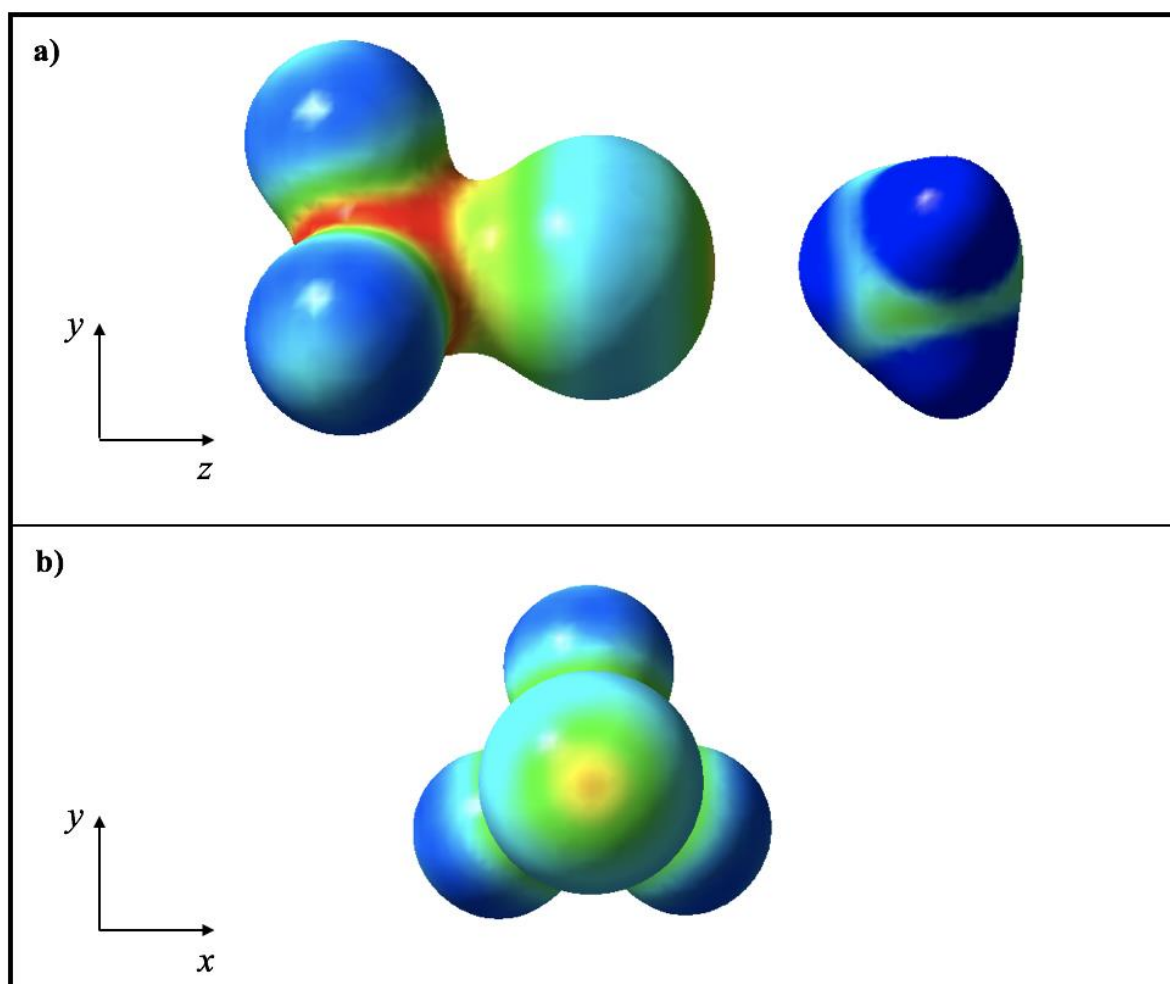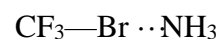

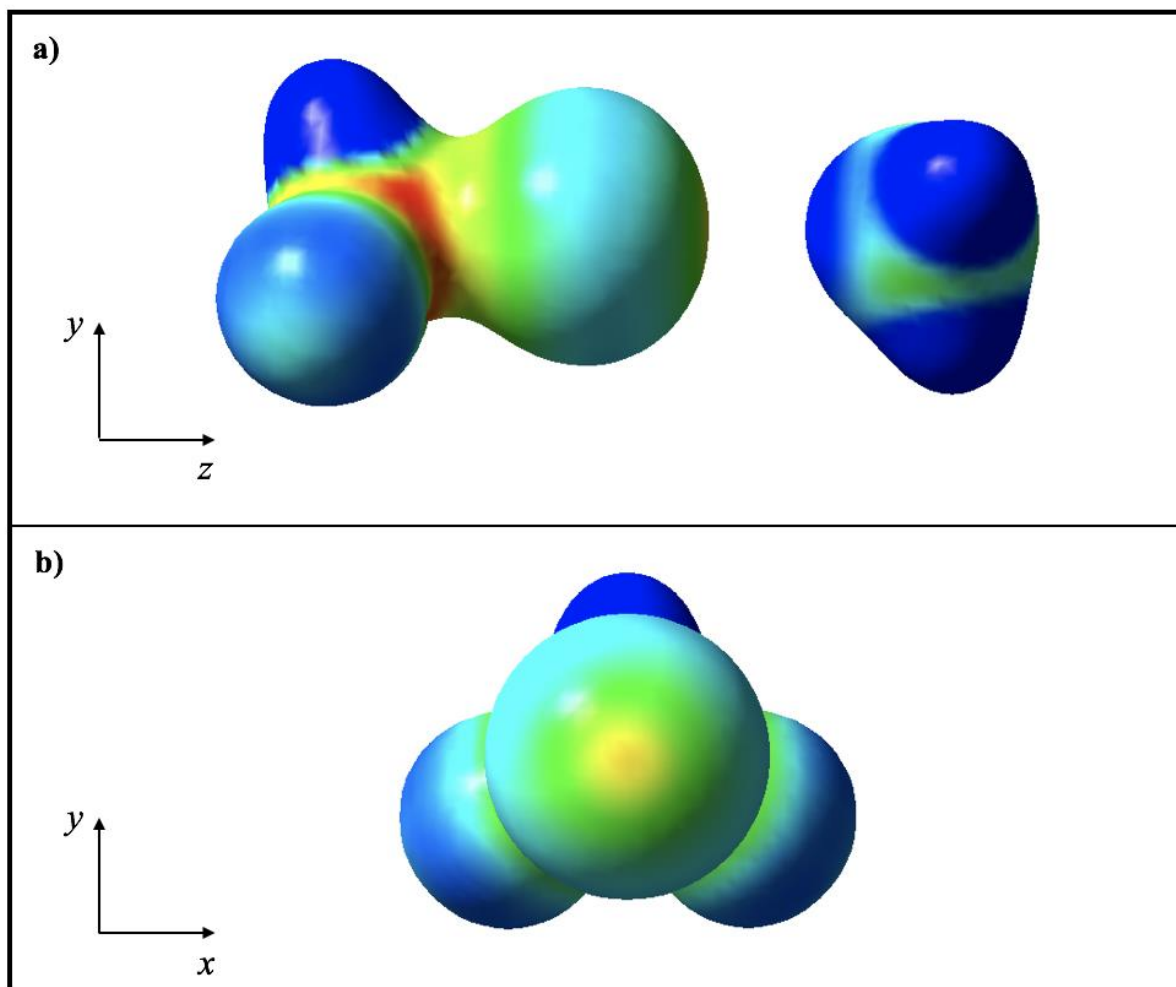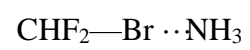

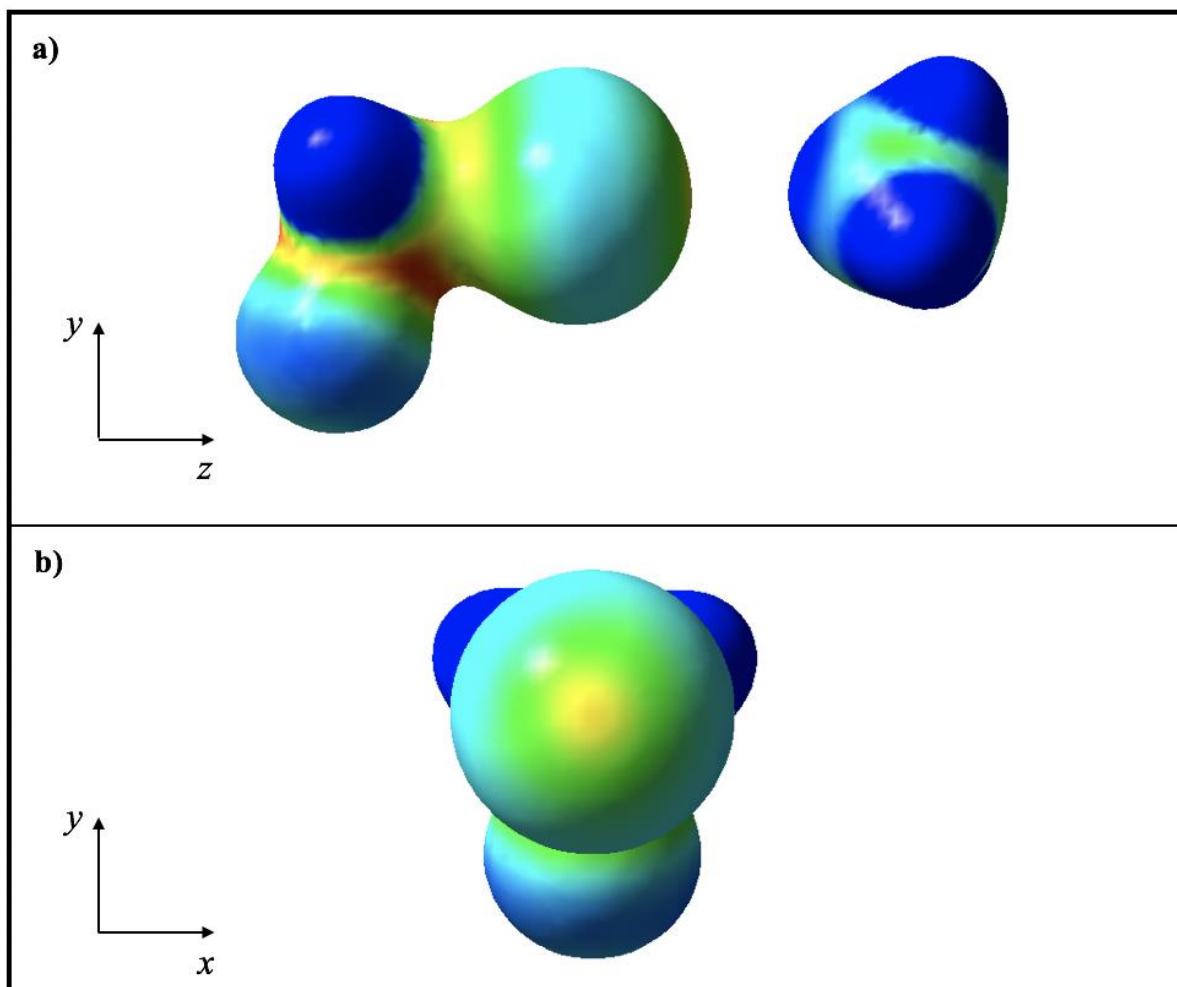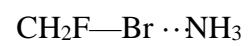

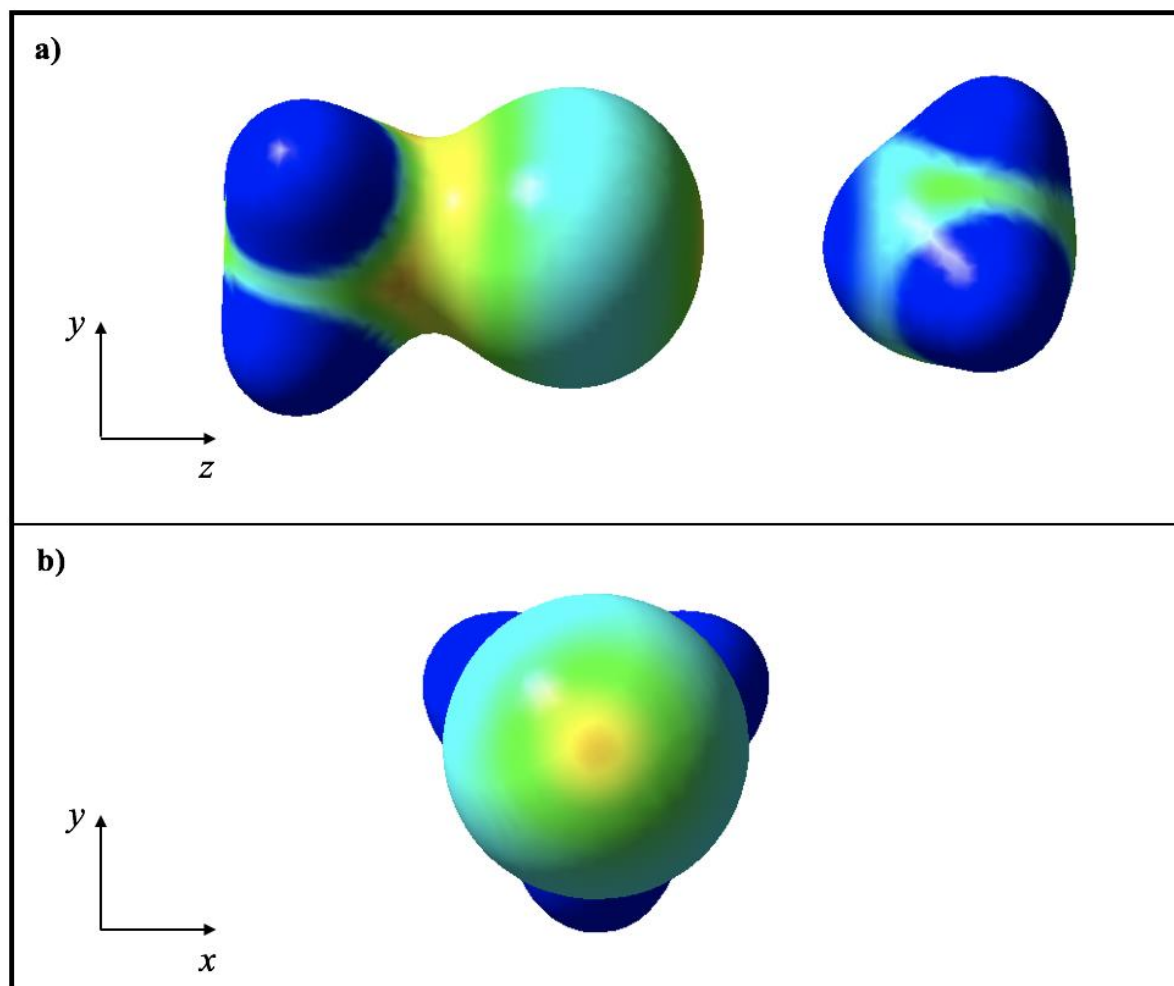

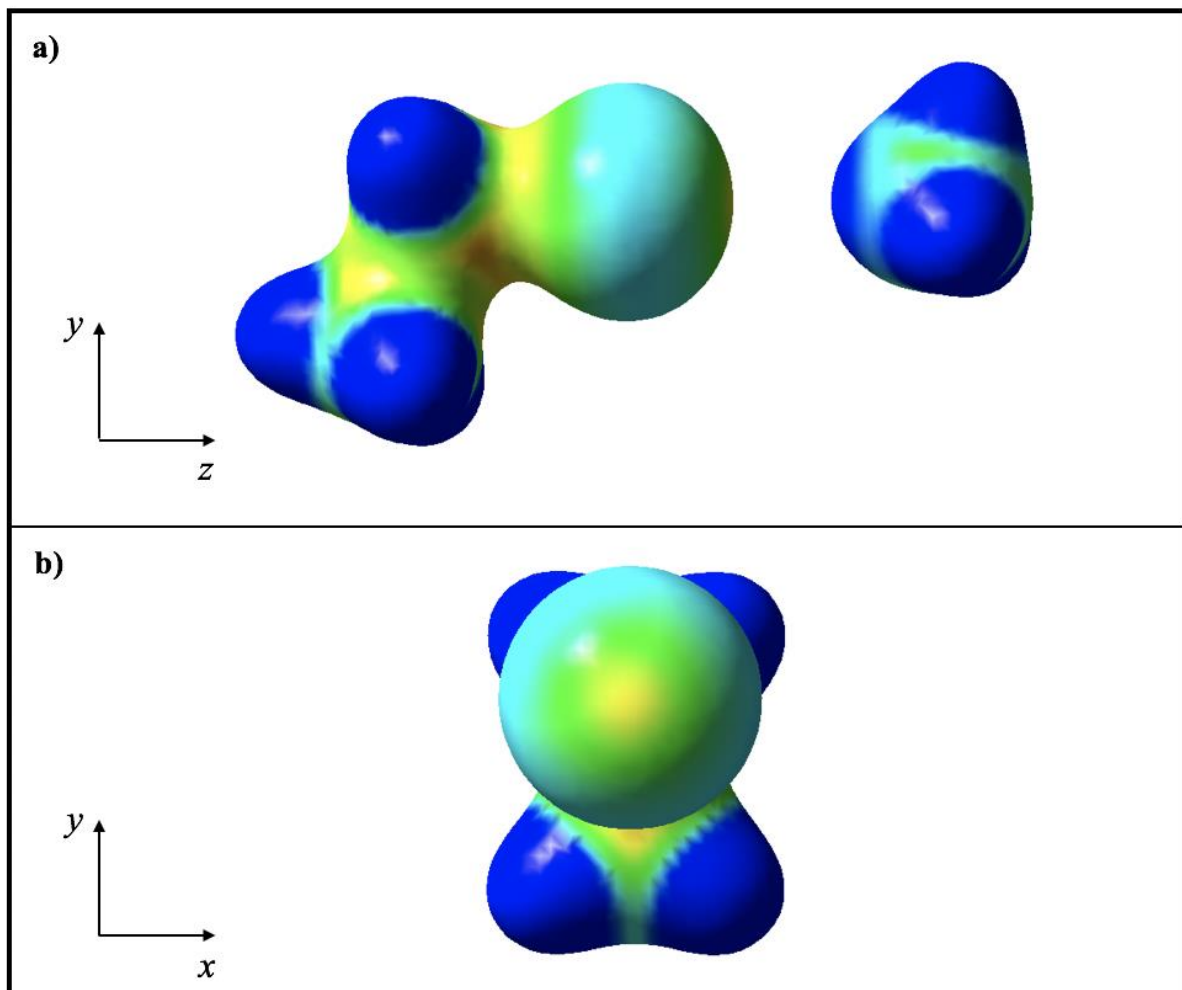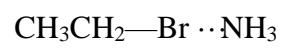

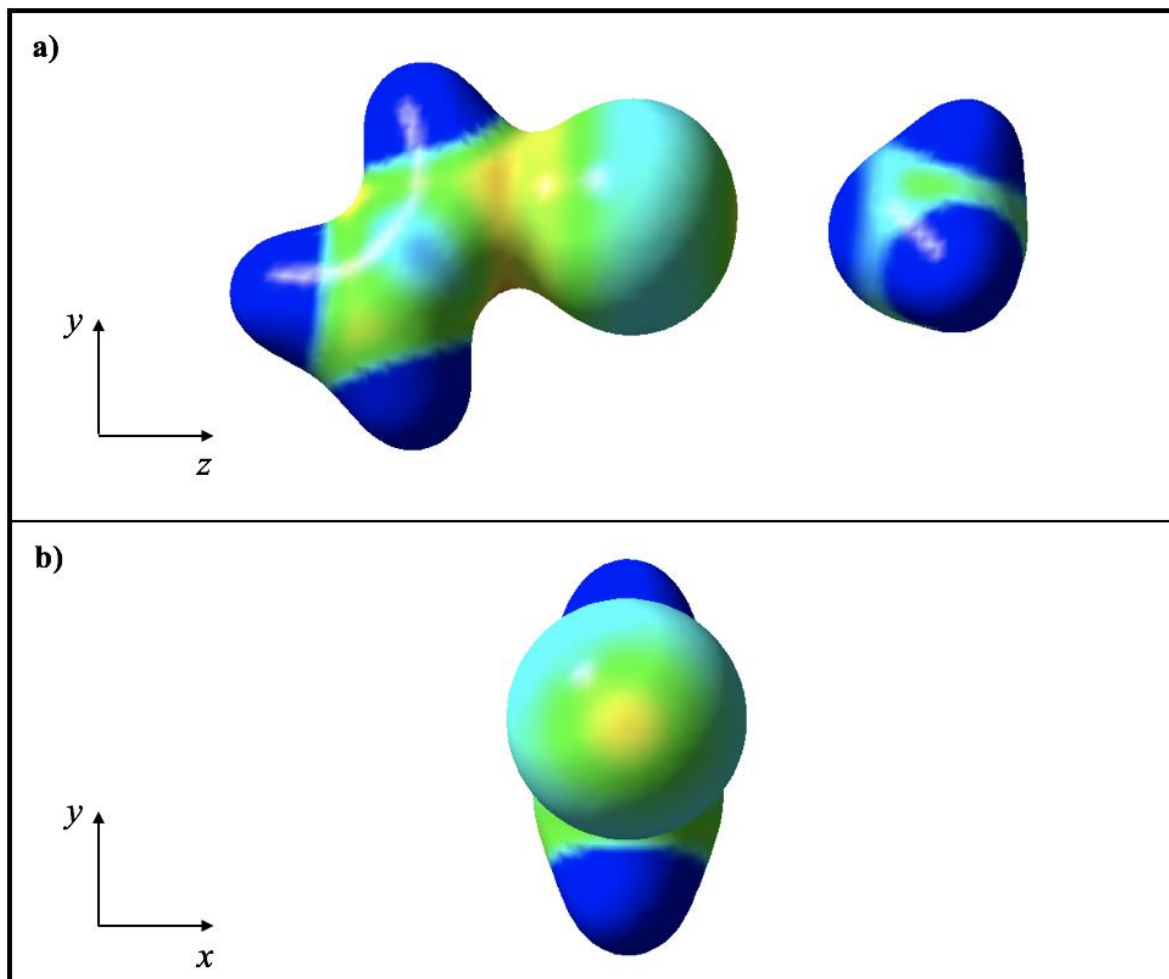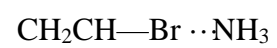

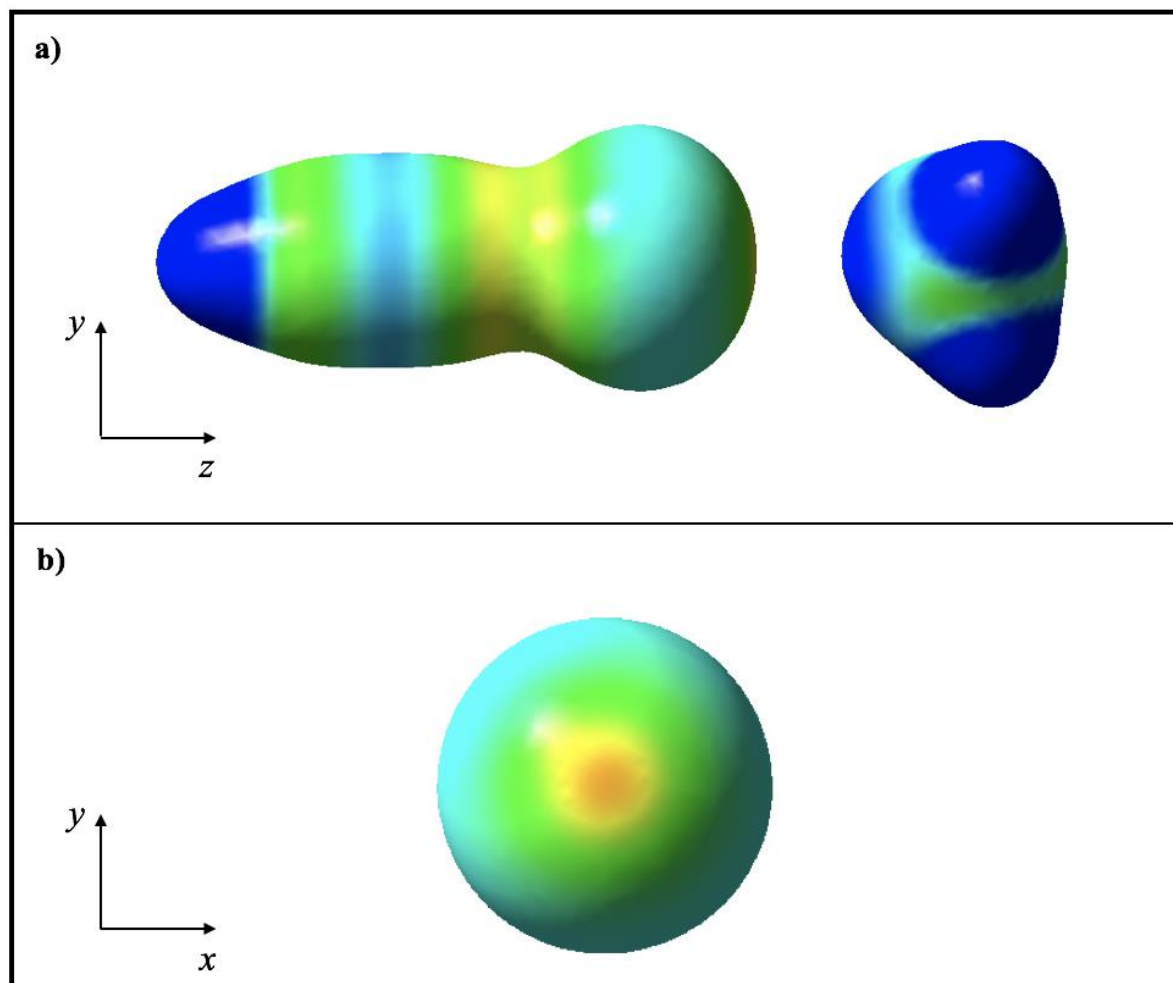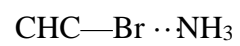

Supplement: s1 [file s1]
